# Supplementary material for: Employing shells to eliminate concentration quenching in photonic upconversion nanostructure
Source: Royal Society of Chemistry journal article supplement (doi:10.1039/c7nr01403a), 2017-01-01
Supplement: c7nr01403a1.pdf [file c7nr01403a1.pdf]

## Supporting Information

### **Employing Shell to Eliminate Concentration Quenching in Photonic Upconversion Nanostructure**

Jing Zuo<sup>a,b,c</sup>, Qiqing Li<sup>a,b</sup>, Bin Xue<sup>a,c</sup>, Cuixia Li<sup>a</sup>, Yulei Chang<sup>a</sup>, Youlin Zhang<sup>a</sup>, Xiaomin Liu<sup>a</sup>, Langping Tu<sup>a,c\*</sup>, Hong Zhang<sup>c</sup> and Xianggui Kong<sup>a\*</sup>

<sup>a</sup> State Key Laboratory of Luminescence and Applications, Changchun Institute of Optics, Fine Mechanics and Physics, Chinese Academy of Sciences, Changchun 130033, China. E-mail: [xgkong14@ciomp.ac.cn](mailto:xgkong14@ciomp.ac.cn), [tulangping@163.com](mailto:tulangping@163.com).

<sup>b</sup> Graduate University of the Chinese Academy of Sciences, Beijing 100049, China

<sup>c</sup> Van 't Hoff Institute for Molecular Sciences, University of Amsterdam, Science Park 904, 1098 XH Amsterdam, The Netherlands.

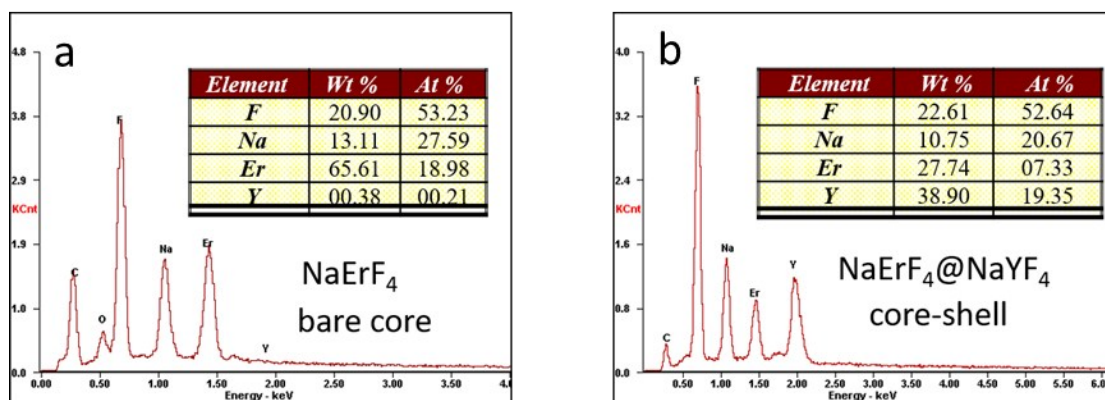

Figure S1. The element analysis results of (a) NaErF<sub>4</sub> bare core and (b) NaErF<sub>4</sub>@NaYF<sub>4</sub> core-shell nanoparticle.

As shown in the Figure S1, in the NaErF<sub>4</sub> bare core, the atom ratio of Er:Y is over 90:1, while in the NaErF<sub>4</sub>@NaYF<sub>4</sub> core-shell nanoparticle, the atom ratio of Er:Y is 0.38:1. These results well according with the calculation results relies on the uniformed core (20 nm) size and shell thickness (5 nm).

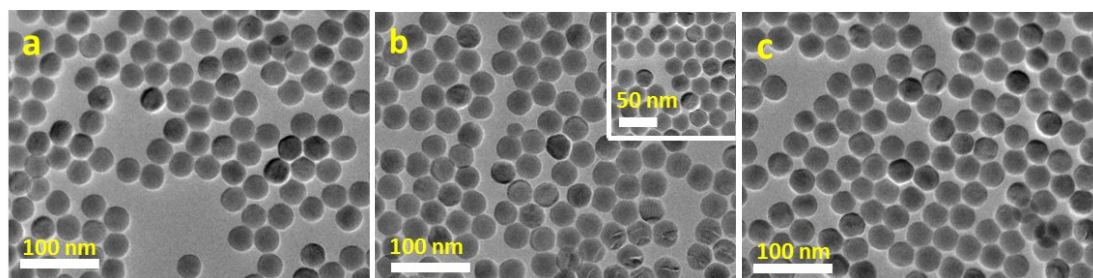

Figure S2. The TEM images of contrast samples (a) NaYF<sub>4</sub>: 20% Yb, 2% Er@NaYF<sub>4</sub> nanoparticles. (b) NaYF<sub>4</sub>: 20% Yb, 2% Er@NaYF<sub>4</sub>: 20% Yb (2.5 nm) @NaYF<sub>4</sub>: 10% Nd (2.5 nm) nanoparticles, inset: the TEM image of intermediate product NaYF<sub>4</sub>: 20% Yb, 2% Er@NaYF<sub>4</sub>: 20% Yb nanoparticle. (c) NaYF<sub>4</sub>: 20% Er@NaYF<sub>4</sub> nanoparticles. All the samples are in the same size with 20 nm core and 5 nm shell.

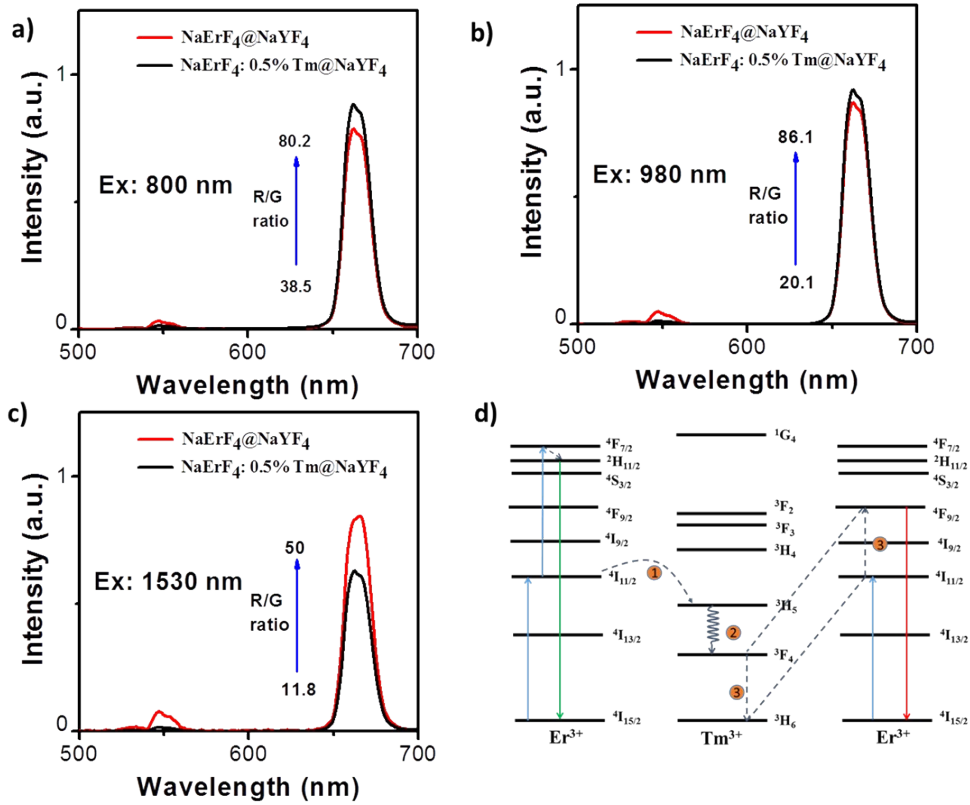

Figure S3. The UC emission spectra of NaErF<sub>4</sub>@NaYF<sub>4</sub> and NaErF<sub>4</sub>: 0.5% Tm@NaYF<sub>4</sub> nanoparticles under the excitation of (a) 800 nm (10 W/cm<sup>2</sup>), (b) 980 nm (10 W/cm<sup>2</sup>) and (c) 1530 nm (1 W/cm<sup>2</sup>), respectively. (d) The schematic of the energy transfer process between Er<sup>3+</sup> and Tm<sup>3+</sup>.

As shown in the Figure S3, doping 0.5% Tm into the core area, all the R/G (red/green) ratios are significantly enhanced, from 38.5 to 80.2 (800 nm excitation), from 20.1 to 86.1 (980 nm excitation) and from 11.8 to 50 (1530 nm excitation), respectively. While the overall UC emission intensity is not changed obviously. The reason can be attributed to the energy transfer between Er<sup>3+</sup> and Tm<sup>3+</sup> (referred to Figure S3d), which will decrease the green emission of Er<sup>3+</sup> efficiently, as described in previous report.<sup>[1]</sup>

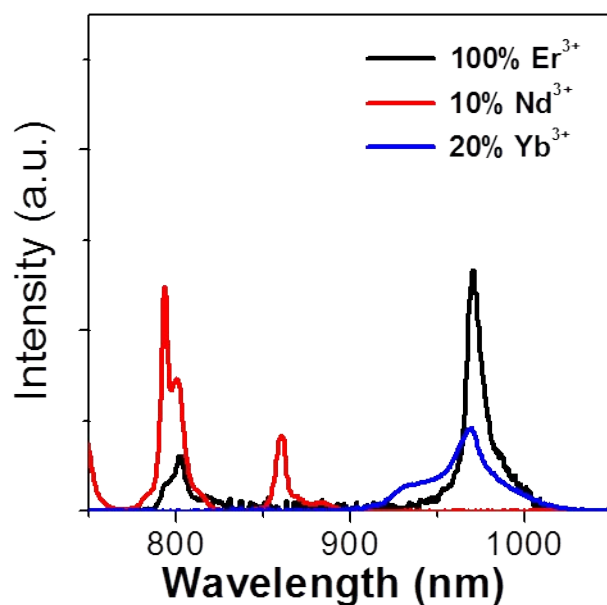

Figure S4. The absorption spectra of NaErF<sub>4</sub>@NaYF<sub>4</sub> core-shell nanoparticles, NaYF<sub>4</sub>: 10% Nd bare core and NaYF<sub>4</sub>: 20% Yb bare core nanoparticles (normalized by the concentration of nanoparticle in cyclohexane).

As shown in the Figure S4, by raising the Er<sup>3+</sup> doping concentration up to 100%, the absorption ability of NaErF<sub>4</sub>@NaYF<sub>4</sub> nanoparticle becomes comparable with co-doping systems. More specifically, it reaches up to 33% of the NaYF<sub>4</sub>: 10% Nd nanoparticle (integration from 770 nm to 830 nm) and 120% of the NaYF<sub>4</sub>: 20% Yb nanoparticle (integration from 920 nm to 1040 nm).

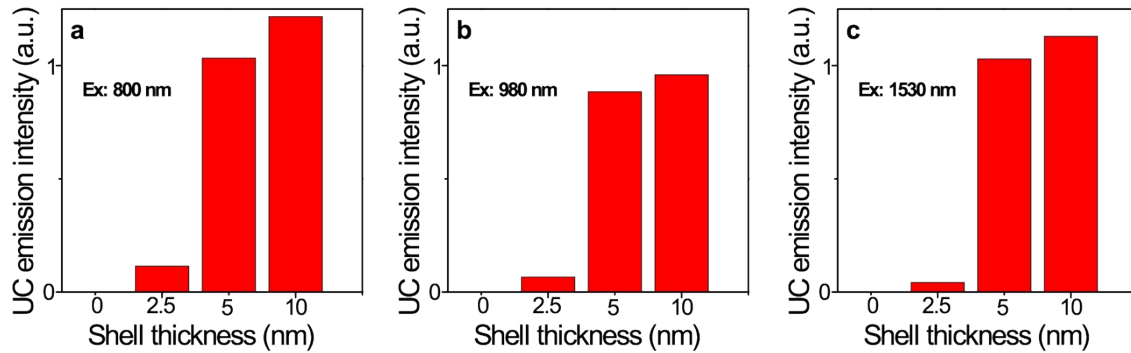

Figure S5. The shell thickness dependent UC emission intensity (integration from 500 nm to 700 nm) of NaErF<sub>4</sub>@NaYF<sub>4</sub> nanostructure (0 nm shell corresponding to the NaErF<sub>4</sub> bare core), the excitation wavelength is (a) 800 nm (10 W/cm<sup>2</sup>), (b) 980 nm (10 W/cm<sup>2</sup>) and (c) 1530 nm (1 W/cm<sup>2</sup>), respectively.

It should be noticed that almost no UC emission could be observed for the NaErF<sub>4</sub> bare core structure (Fig. S5 a-c), due to the numerous defects located on the surface of nanoparticle. But after the NaYF<sub>4</sub> shell coating strategy to passivate the surface defects, the NaErF<sub>4</sub>@NaYF<sub>4</sub> nanostructure generates a much more efficient UC emission. This protective effect nearly achieves saturation beyond 5 nm shell thickness in cyclohexane solution.

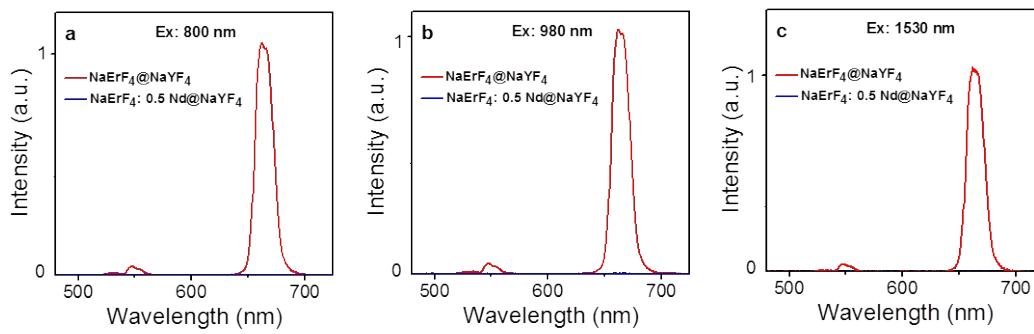

Figure S6. The UC emission spectra of the NaErF<sub>4</sub>@NaYF<sub>4</sub> (20 nm core and 5 nm shell) and NaErF<sub>4</sub>: 0.5 mol% Nd@NaYF<sub>4</sub> (20 nm core and 5 nm shell) nanoparticle under the (a) 800 nm, (b) 980 nm and (c) 1530 nm excitation, respectively.

As shown in the Figure S6, by introducing 0.5 mol% Nd<sup>3+</sup> into the core area as energy trappers,<sup>[2]</sup> which plays the role of bulk quenching sites, the UC emission will be almost completely quenched.

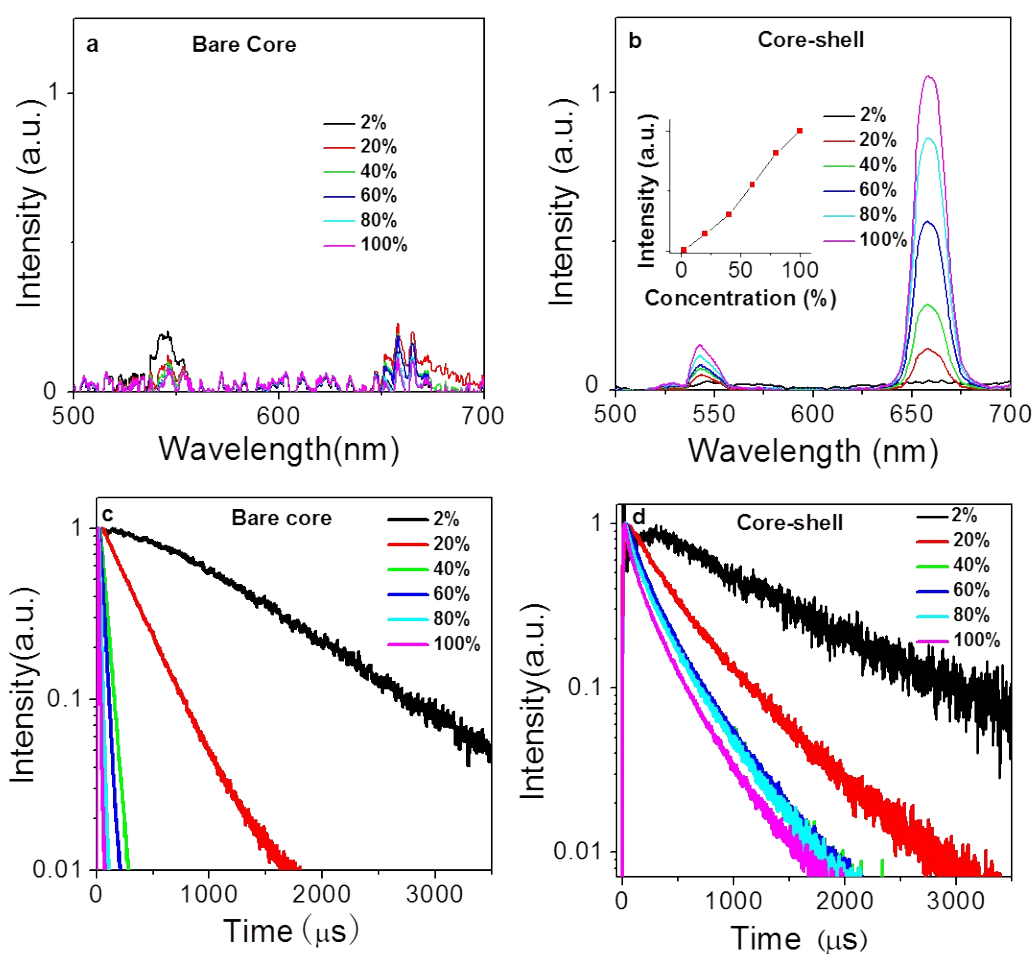

Figure S7. The UC emission spectra of solutions containing: a) NaYF<sub>4</sub>: x% Er (x: 2-100) bare core, b) NaYF<sub>4</sub>: x% Er (x: 2-100)@NaYF<sub>4</sub> core-shell nanoparticles in cyclohexane (~1 wt%, excited by 800 nm, 10 W/cm<sup>2</sup>). Insert in Fig S7b: the concentration dependent UC emission intensity (integration from 500 nm to 700 nm) in core-shell structure. And the corresponding decay curves of Er<sup>3+</sup>: <sup>4</sup>F<sub>9/2</sub> → <sup>4</sup>I<sub>15/2</sub> transition, *i.e.* ~ 650 nm, in c) NaYF<sub>4</sub>: x% Er bare core and d) NaYF<sub>4</sub>: x% Er @NaYF<sub>4</sub> core-shell nanoparticles. It should be noticed that the 800 nm excited bare core UC emission is too weak to be analyzed well.

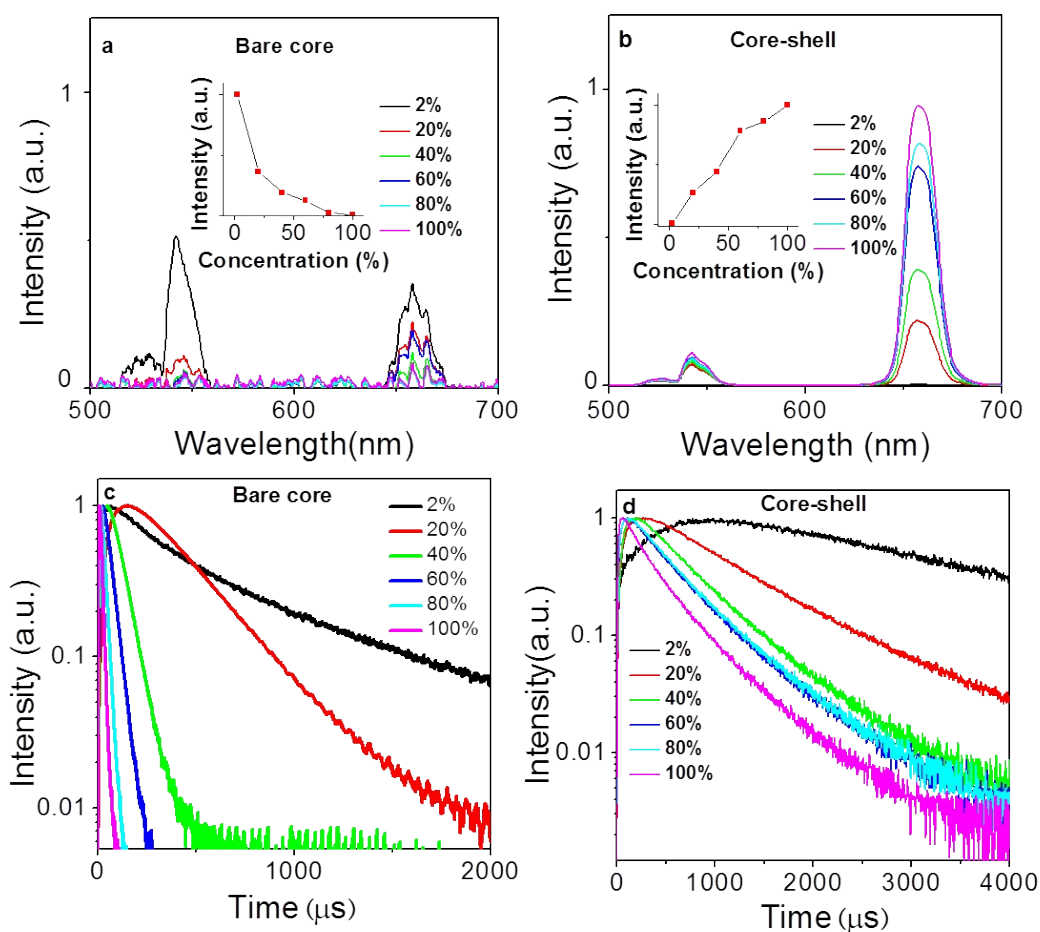

Figure S8. The UC emission spectra of solutions containing: a) NaYF<sub>4</sub>: x% Er (x: 2-100) bare core, b) NaYF<sub>4</sub>: x% Er (x: 2-100)@NaYF<sub>4</sub> core-shell nanoparticles in cyclohexane (~1 wt%, excited by 1530 nm, 1 W/cm<sup>2</sup>). Inserts in Fig S8a,b: the concentration dependent UC emission intensity (integration from 500 nm to 700 nm) in bare core and core-shell structures. And the corresponding decay curves of Er<sup>3+</sup>: <sup>4</sup>F<sub>9/2</sub> → <sup>4</sup>I<sub>15/2</sub> transition, *i.e.* ~ 650 nm, in c) NaYF<sub>4</sub>: x% Er bare core and d) NaYF<sub>4</sub>: x% Er@NaYF<sub>4</sub> core-shell nanoparticles.



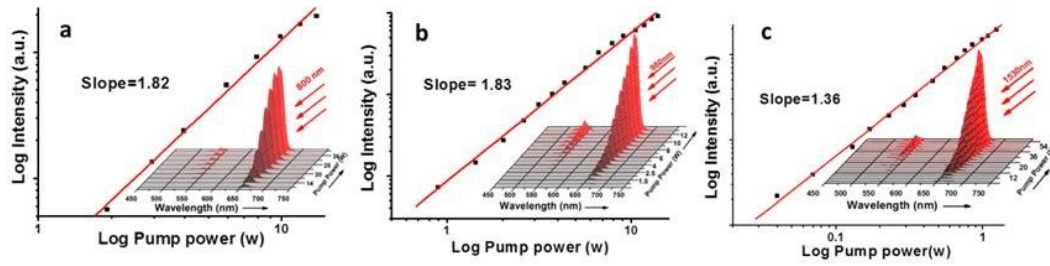

Figure S9. Log-log plots of the  $\sim 650$  nm UC emission intensity of  $\text{NaErF}_4@ \text{NaYF}_4$  nanoparticles as a function of pump power at (a) 800nm, (b) 980nm and (c) 1530 nm, respectively. The output slopes are measured as 1.82, 1.83 and 1.36, respectively, exhibiting the non-linear relationship between UC emission intensity and excitation power.

## References

- [1] E. M. Chan, G. Han, J. D. Goldberg, D. J. Gargas, A. D. Ostrowski, P. J. Schuck, B. E. Cohen, D. J. Milliron, *Nano Lett.* **2012**, *12*, 3839-3845.
- [2] Y. T. Zhong, G. Tian, Z. J. Gu, Y. J. Yang, L. Gu, Y. L. Zhao, Y. Ma, J. N. Yao, *Adv. Mater.* **2014**, *26*, 2831-2837.
